## Correction: Colon cancer-induced interleukin-35 inhibits beta-catenin-mediated pro-oncogenic activity

Yueqiang Jiang<sup>1,\*</sup>, Yanling Ma<sup>2,\*</sup>, RuiChao Li<sup>1</sup> and JianHai Sun<sup>2</sup>

<sup>1</sup> Department of Gerontology, Tongji Hospital, Tongji Medical College, Huazhong University of Science and Technology, Wuhan, Hubei Province, China

<sup>2</sup> Department of Oncology, the Third People's Hospital, Wuhan, Hubei Province, China

\* Co-first author

**Published:** August 03, 2018

**Copyright:** Jiang et al. This is an open-access article distributed under the terms of the Creative Commons Attribution License 3.0 (CC BY 3.0), which permits unrestricted use, distribution, and reproduction in any medium, provided the original author and source are credited.

**This article has been corrected:** The correct author names are given below:

**Yueqiang Jiang and Yanling Ma**

Original article: Oncotarget. 2018; 9:11989-11998. <https://doi.org/10.18632/oncotarget.22857>
